# Supplementary material for: Consensus Rules in Variant Detection from Next-Generation Sequencing Data
Source: PLOS journal article supplement (doi:10.1371/journal.pone.0038470), 2012-06-08

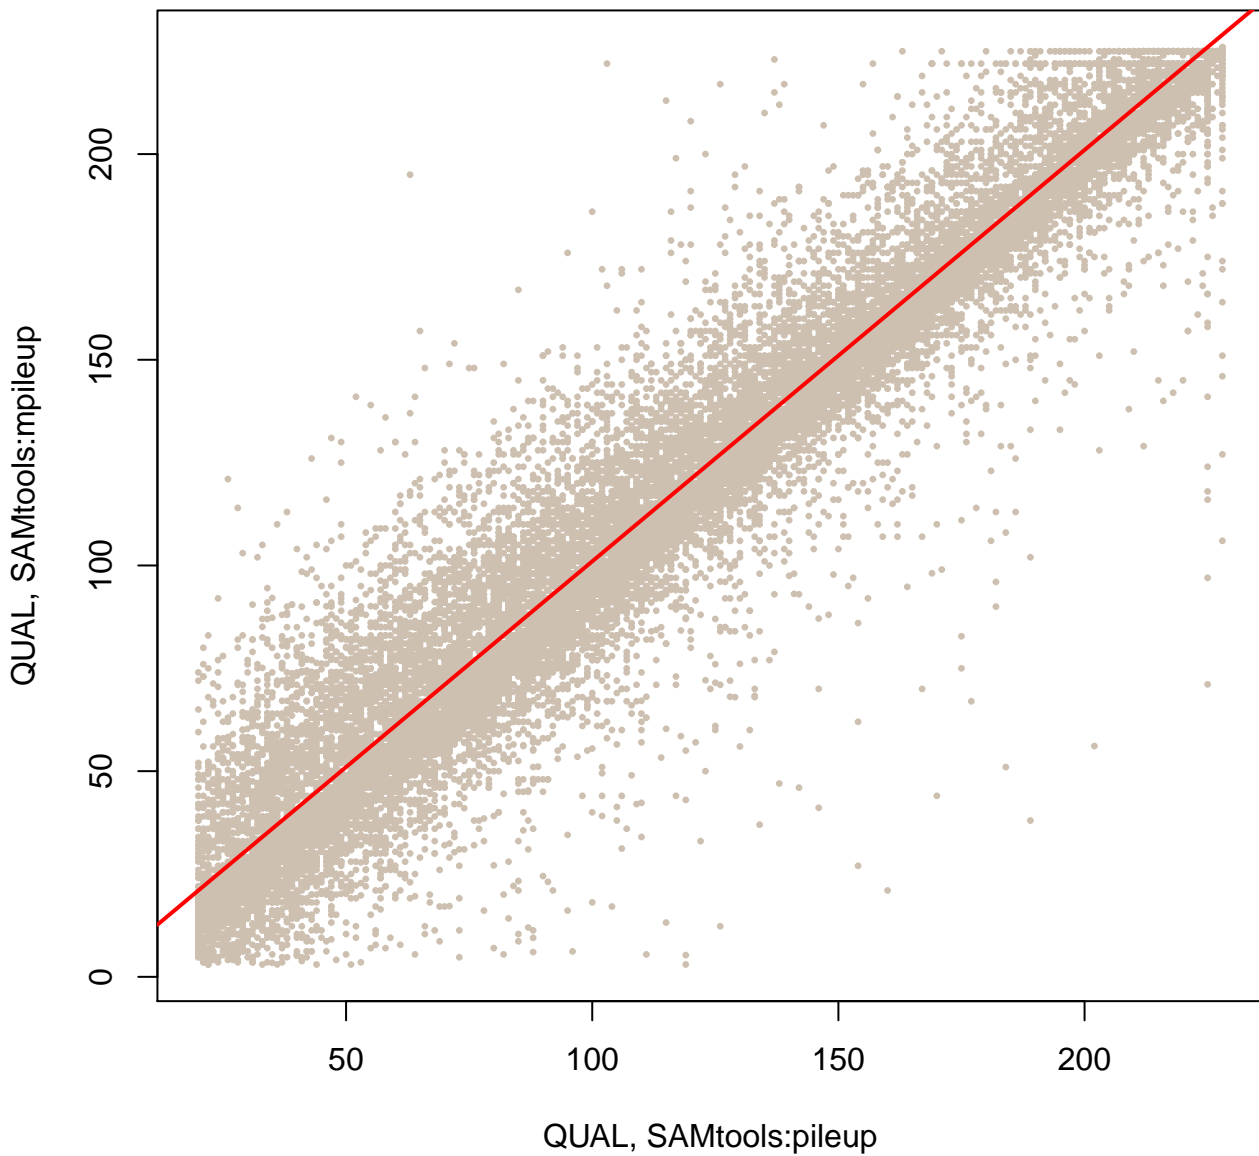

Supplement: S1 (10.1371/journal.pone.0038470.s001) [file journal.pone.0038470.s001]
